# Supplementary material
Source: publisher figshare collection journal article supplement (https://future-science-group.figshare.com/ndownloader/files/33020828)
Supplement: Supplementary file 1 [file 33020828]

## Sheet: Sheet1
Supplementary Table 2 - COX analysis
CancerType	ALKBH5	FTO	HNRNPA2B1	HNRNPC	IGF2BP1	IGF2BP2	IGF2BP3	METTL3	METTL14	RBM15	RBM15B	RBMX	VIRMA	WTAP	YTHDC1	YTHDC2	YTHDF1	YTHDF2	YTHDF3	ZC3H13
ACC	1.16541	0.527959	27.901	5.47558	1.69696	1.53991	4.09335	1.66127	0.509956	7.80165	2.24308	4.13013	2.17432	1.9124	1.53484	0.90794	1.74317	3.06474	0.971877	0.975988
BLCA	1.4213	1.51982	0.792675	1.0889	1.02534	1.10704	1.30956	0.871857	0.719468	0.982916	0.905535	0.778522	1.11796	0.751263	0.58707	0.889671	0.89702	0.782211	0.838761	1.20072
BRCA	0.972087	1.1093	0.806232	0.472676	1.50872	0.911156	0.879607	0.774808	0.97478	0.854406	0.520695	0.992396	1.19202	1.13288	0.792742	1.05017	1.13871	0.948333	1.3966	1.09017
CESC	0.828953	1.04507	1.5357	1.4407	1.07792	1.02764	0.953724	1.17174	1.11521	0.827638	1.02283	0.56056	1.57611	1.41972	0.921114	0.908836	0.650384	1.25235	1.56688	1.57692
CHOL	3.16735	0.620784	0.768339	0.329694	1.58458	1.61893	0.840367	0.656397	1.32082	0.301054	0.890323	0.759	0.629177	1.03859	0.814069	0.550612	0.687023	0.753637	0.611955	1.49888
COAD	1.40606	0.889878	1.12934	0.977412	1.20527	1.23444	1.09224	1.29186	0.801466	0.885237	1.04036	0.771474	1.09636	0.837353	0.914252	0.672731	1.03291	0.829001	0.832195	0.980402
DLBC	2.27862	1.6308	0.789836	1.51575	0.226003	0.654269	1.03881	1.03244	2.88302	0.540714	1.47419	1.04731	1.25395	0.263454	1.706	1.59787	1.14334	1.8324	1.68066	1.47824
ESCA	0.416504	0.905718	1.94913	1.7337	0.969518	1.05232	1.11243	1.05447	0.6997	0.944536	0.680046	2.16512	1.19888	1.2828	1.33695	0.977285	0.88484	0.742284	0.88167	1.24125
GBM	1.61274	0.786254	1.1295	0.546935	0.889883	1.00074	0.973614	0.866852	0.907016	0.806542	1.06047	0.693346	0.806823	0.985624	0.894558	0.801847	1.08173	1.20723	0.777453	0.889706
HNSC	1.14843	1.20066	1.15821	1.66654	1.13916	1.19504	1.08835	0.966662	1.05059	0.819444	0.76124	1.12175	1.13096	1.06173	0.890486	0.71764	1.20968	1.01591	1.00975	1.12838
KICH	7.88823	2.17918	98.7287	4.65867	21032.4	0.995394	4.07031	10.9464	3.65958	4.80138	3.21576	2.20028	12.4084	1.1536	2.01048	5.06958	5.04141	22.8511	6.83088	2.47852
KIRC	0.9169	0.678452	2.25811	0.864884	1.36739	1.46145	2.06323	1.44554	0.312918	0.696485	0.741865	0.572922	0.561619	1.12673	0.56675	0.681283	1.21055	0.538422	0.661611	0.556169
KIRP	0.612097	0.679995	1.36536	7.05182	2.59321	1.16236	5.14135	0.948754	0.488547	2.83732	0.807552	2.48163	4.52334	1.80594	0.689595	1.09508	1.14828	0.954356	1.54681	0.965813
LAML	2.63163	0.715854	0.465703	1.08662	0.0117305	1.39694	3.04262	0.940026	0.52544	1.1592	1.03793	0.690964	0.769579	0.72483	0.534588	0.49906	0.813641	0.824008	0.382451	0.930498
LGG	2.15255	0.544763	2.16048	0.736507	80.0993	1.55769	2.28807	0.734356	1.25772	3.85491	1.12532	0.83494	1.06601	1.93482	0.46732	1.80513	2.49954	2.90107	1.52024	0.920413
LIHC	0.988599	1.09542	1.62864	1.82503	1.16752	1.19862	1.57033	1.71327	0.852254	1.56813	1.82338	1.52573	1.74594	1.5456	1.39262	1.18205	2.53689	2.74218	1.2884	0.772144
LUAD	1.13297	0.76036	1.40093	1.73736	1.32453	1.14675	1.1788	0.789469	0.81922	1.15153	1.26842	0.909377	1.14074	1.00155	0.859408	0.7662	0.780769	0.736858	1.02001	0.995969
LUSC	0.974961	1.25031	0.901255	0.717643	0.944659	0.970658	0.897254	0.761336	1.04498	0.763357	0.98307	0.922843	1.1885	0.917409	0.8228	0.89683	1.10348	1.00963	1.0458	1.05342
MESO	0.694425	0.819655	1.69982	0.975462	1.5593	1.37395	2.5269	0.492897	0.352362	1.42599	1.2011	0.733228	1.22865	1.52573	0.544855	0.793326	2.17926	0.618275	0.74179	1.00774
OV	0.808131	1.15301	0.740308	0.663235	1.20376	1.00506	0.978385	0.886526	1.06609	0.940625	0.952177	0.765227	1.3298	1.29544	0.86932	1.22229	1.03313	0.91341	1.09594	1.13396
PAAD	0.456107	0.799164	1.25537	2.06873	1.2715	1.58805	1.67131	0.574101	0.593279	1.85313	0.857646	0.777814	1.81622	0.790199	0.771054	0.846225	0.562022	1.30332	1.21664	1.06384
PCPG	0.648066	0.399019	0.906489	0.965853	1.1e-19	1.42931	268.859	2.52941	2.49666	1.55104	1.17344	15.7165	0.317625	0.311668	1.87159	0.579726	1.76928	0.978653	0.504533	0.967641
PRAD	3.87665	1.41863	6.74327	3.44283	1.93e-16	0.622251	1.38e-09	2.18718	20.1887	4.59965	4.5622	5.14025	1.56939	1.14056	4.04474	2.00993	6.2641	12.5994	1.48083	1.21536
READ	1.43372	0.763673	0.523129	0.979884	1.0283	1.16047	0.929737	0.591726	0.320233	0.251761	0.457087	0.323453	0.592746	0.465388	0.624727	0.265791	0.713858	0.366234	0.708617	1.00798
SARC	0.909567	0.844269	1.79036	2.04231	1.48267	1.21588	1.40927	1.15952	0.757042	1.30345	1.63098	1.68033	1.4939	0.897816	1.21707	0.964933	1.25009	2.60587	1.22062	0.967815
SKCM	1.12243	0.996853	0.745302	0.86035	1.06369	0.963402	0.99968	0.747997	0.651819	0.756519	1.32091	0.764128	0.805665	0.624745	0.693341	0.761482	1.12358	0.880356	0.927847	1.07468
STAD	0.707277	1.70463	0.687508	0.825713	1.07057	0.940333	0.975642	0.687535	0.798791	0.609925	0.80947	0.944729	0.97176	0.796825	0.676694	0.935104	0.874081	0.704114	1.01952	0.915788
TGCT	0.986107	1.21435	0.378846	0.312909	1.98793	1.26151	1.44666	0.433575	1.35316	1.25281	0.882202	0.703307	0.513624	1.77388	0.282166	1.77998	3.40192	0.476092	0.676015	0.639811
THCA	3.98406	5.1378	0.76799	0.569183	1.644	0.70612	1.48606	0.83374	1.66415	16.0603	1.35229	0.754	8.9332	0.625008	1.29389	6.0649	4.51241	2.59769	10.242	0.86731
THYM	1.2296	0.762446	0.491469	0.510503	0.351281	0.77728	1.40497	0.904599	0.624267	0.250238	0.13153	0.151295	0.225968	0.184735	0.489451	1.09748	0.259555	0.347421	0.583266	0.82368
UCEC	0.877161	1.05328	0.9138	0.994129	1.21125	1.11876	1.24465	1.0105	0.902467	1.23471	1.02437	1.52816	1.75805	1.22477	1.04928	1.05733	1.4288	0.799604	1.53771	0.887889
UCS	1.18267	1.38741	0.928508	1.37357	0.823729	0.876522	0.909712	0.885527	0.929645	1.13854	1.51565	0.760744	1.58082	0.922868	0.820604	1.9095	1.68123	1.32817	1.11056	0.831009
UVM	2.01696	0.651409	1.76541	1.2398	0.278169	0.407942	2.81979e+06	1.36913	0.961746	1.17213	0.132061	0.573682	2.30177	1.1839	0.927597	1.66484	3.89322	1.39508	1.93989	0.702398
